# Supplementary material for: Allogeneic hematopoietic cell transplantation for blastic plasmacytoid dendritic cell neoplasm: a CIBMTR analysis
Source: PubMed Central journal article supplement — Blood Adv. 2023 Oct 5;7(22):7007–16. doi: 10.1182/bloodadvances.2023011308 (PMC10690553; doi:10.1182/bloodadvances.2023011308), 2023-10-05
Supplement: BLOODA_ADV-2023-011308-mmc1.pdf [file BLOODA_ADV-2023-011308-mmc1.pdf]

## Supplemental Appendix

The material accompanies “Allogeneic Hematopoietic Cell Transplantation for Blastic Plasmacytoid Dendritic Cell Neoplasm: an analysis from the Center for International Blood and Marrow Transplant Research” by Hemant S. Murthy et al.

### **Supplementary Content**

Supplementary Table 1: Univariate analysis

Supplementary Table 2: Causes of death

Supplementary Table 3: Full conditioning regimen list

Supplemental Table 1: Univariate analysis results  
 Study population (N = 164)

| Outcomes              | N   | Prob (95% CI)      |
|-----------------------|-----|--------------------|
| Overall survival      | 164 |                    |
| 1-year                |     | 74.9 (68-81.3) %   |
| 3-year                |     | 57.9 (49.9-65.7) % |
| 5-year                |     | 51.2 (42.5-59.8) % |
| Disease-free survival | 163 |                    |
| 1-year                |     | 66.9 (59.5-73.9) % |
| 3-year                |     | 48.8 (40.9-56.8) % |
| 5-year                |     | 44.4 (36.2-52.8) % |
| Relapse               | 163 |                    |
| 1-year                |     | 16.6 (11.3-22.7) % |
| 3-year                |     | 28.9 (22-36.3) %   |
| 5-year                |     | 32.2 (24.7-40.3) % |
| Non-relapse mortality | 163 |                    |
| 1-year                |     | 16.6 (11.3-22.7) % |
| 3-year                |     | 22.3 (16.1-29.2) % |
| 5-year                |     | 23.3 (16.9-30.4) % |
| Chronic GVHD          | 163 |                    |
| 6 months              |     | 27.9 (21.2-35.1) % |
| 1-year                |     | 45.5 (37.8-53.3) % |
| 2-year                |     | 52.7 (44.8-60.6) % |
| 3-year                |     | 54.4 (46.4-62.3) % |

Supplemental Table 2. Cause of death

|                      | <b>N (%)</b> |
|----------------------|--------------|
| Total                | 72           |
| Primary disease      | 29 (40)      |
| GVHD                 | 16 (22)      |
| Infection            | 6 (8)        |
| Respiratory          | 4 (6)        |
| Organ failure        | 7 (10)       |
| Cardiac              | 1 (1)        |
| Neurologic           | 4 (6)        |
| Secondary malignancy | 1 (1)        |
| Missing              | 4 (6)        |

### Supplemental Table 3. Conditioning Regimens

|                                    |          |
|------------------------------------|----------|
| Conditioning regimen - no. (%)     |          |
| TBI/Cy                             | 28 (17)  |
| TBI/Cy/Flu                         | 20 (12)  |
| TBI/Cy/Flu/TT                      | 1 (1)    |
| TBI/VP                             | 3 (2)    |
| TBI/Mel                            | 1 (1)    |
| TBI/Flu                            | 23 (14)  |
| TBI/other(s)                       | 1 (1)    |
| Bu/Cy                              | 16 (10)  |
| Flu/Bu (MAC)                       | 24 (15)  |
| Flu/Bu (RIC)                       | 16 (10)  |
| Flu/Mel                            | 26 (16)  |
| Cy/Flu                             | 4 (2)    |
| Other(s)                           | 1 (1)    |
| In-vivo T-cell depletion - no. (%) |          |
| No                                 | 136 (83) |
| Yes                                | 28 (17)  |
